# Supplementary material for: Hidden Rice Diversity in the Guianas
Source: Front Plant Sci. 2019 Sep 20;10:1161. doi: 10.3389/fpls.2019.01161 (PMC6764085; doi:10.3389/fpls.2019.01161)
Supplement: Supplementary file 3 [file Table_2.xlsx]

## Sheet: Sheet1
Supplementary Table S2. Accessions from Suriname and French Guiana that were part of the 3000 Rice Genomes Project (Wang et al., 2018) and resequenced in this study for comparison with Maroon varieties.
BioProject	BioSample	SRA Project	SRA Sample	IRIS ID	Genetic stock accession	IRGC ID	DNA source accession	IRGC variety name	Country of origin	Status	K9 cluster	Additional information from literature
PRJEB6180	SAMEA2567626	ERP005654	ERS467904	IRIS_313-9464	IRGC 125903	3059150	IRGC 13389	SML ACORNI	Suriname	Improved cultivar	Admixed	improved wetland cultivar, developed in 1970s in Suriname
PRJEB6180	SAMEA2567490	ERP005654	ERS467768	IRIS_313-9939	IRGC 121316	3058560	IRGC 50642	CIWINI SML	Suriname	Improved cultivar	Admixed	improved wetland cultivar, developed in 1970s in Suriname
PRJEB6180	SAMEA2568316	ERP005654	ERS468594	IRIS_313-7922	IRGC 122119	3302290		IRAT 234	French Guiana	?	Tropical japonica	?
PRJEB6180	SAMEA2569266	ERP005654	ERS469544	IRIS_313-10710	IRGC 128135	4055203	IRGC 14795	PINDE GOGO WIERIE	Suriname	Traditional landrace	Tropical japonica	Traditional Maroon landrace collected ca. 1970
PRJEB6180	SAMEA2567525	ERP005654	ERS467803	IRIS_313-9519	IRGC 125936	3059103	IRGC 3394	WANICA	Suriname	Traditional landrace	Tropical japonica	Traditional landrace from ca. 1907
PRJEB6180	SAMEA2568131	ERP005654	ERS468409	IRIS_313-9851	IRGC 126977	3058649	IRGC 14791	GOGOWIERIE	Suriname	Traditional landrace	Tropical japonica	Traditional Maroon landrace collected ca. 1970
PRJEB6180	SAMEA2567637	ERP005654	ERS467915	IRIS_313-10290	IRGC 125963	3058193	IRGC 116980	ELONI	Suriname	Improved cultivar	Indica	improved wetland cultivar, developed in 1970s in Suriname
PRJEB6180	SAMEA2567917	ERP005654	ERS468195	IRIS_313-10325	IRGC 125956	3058879	IRGC 116963	CAMPONI	Suriname	Improved cultivar	Indica	improved wetland cultivar, developed in 1970s in Suriname
PRJEB6180	SAMEA2569770	ERP005654	ERS470048	IRIS_313-11253	NA		IRGC 40642	SML-CAMPONI	Suriname	Improved cultivar	Indica	improved wetland cultivar, developed in 1970s in Suriname
PRJEB6180	SAMEA2567843	ERP005654	ERS468121	IRIS_313-9841	IRGC 125904	3058659	IRGC 13391	SML AWINI	Suriname	Improved cultivar	Indica	improved wetland cultivar, developed in 1970s in Suriname
